# Supplementary material for: High-performance photodetectors and enhanced photocatalysts of two-dimensional TiO2nanosheets under UV light excitation
Source: Royal Society of Chemistry journal article supplement (doi:10.1039/c5nr09248e), 2016-01-01
Supplement: c5nr09248e1.pdf [file c5nr09248e1.pdf]

## Supporting Information

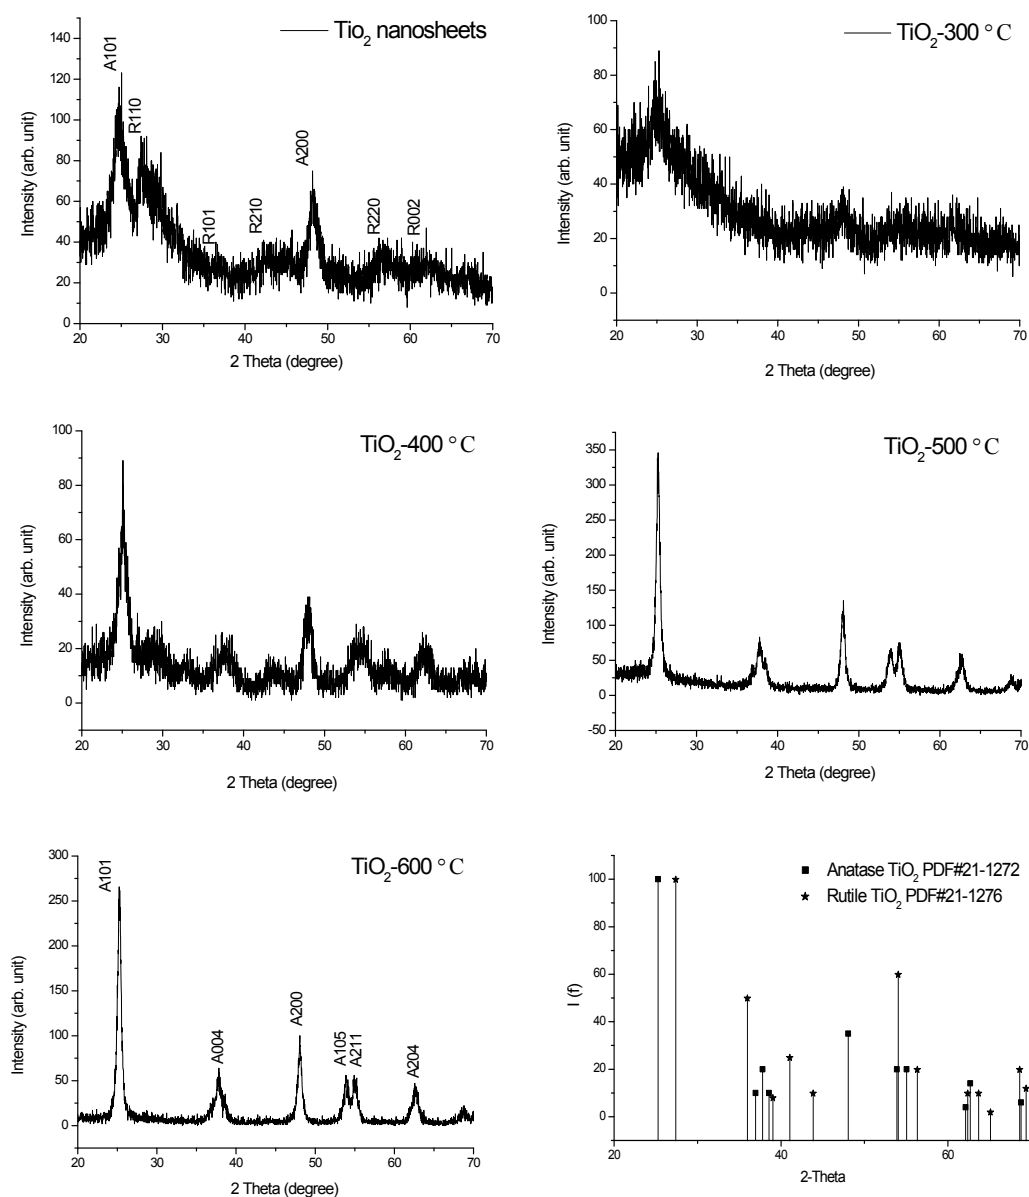

Fig. S1 XRD of samples derived from  $\text{TiO}_2$  nanosheets calcined at various temperatures. (■: anatase (PDF#21-1272); ★: rutile (PDF#21-1276)).

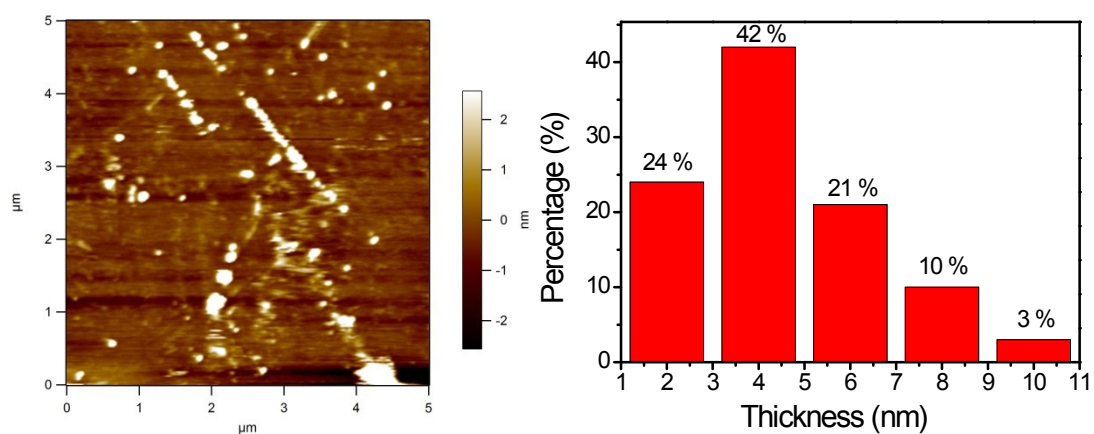

Fig. S2 AFM image of the as-grown 2D TiO<sub>2</sub> nanosheets and the corresponding statistical thickness distribution.

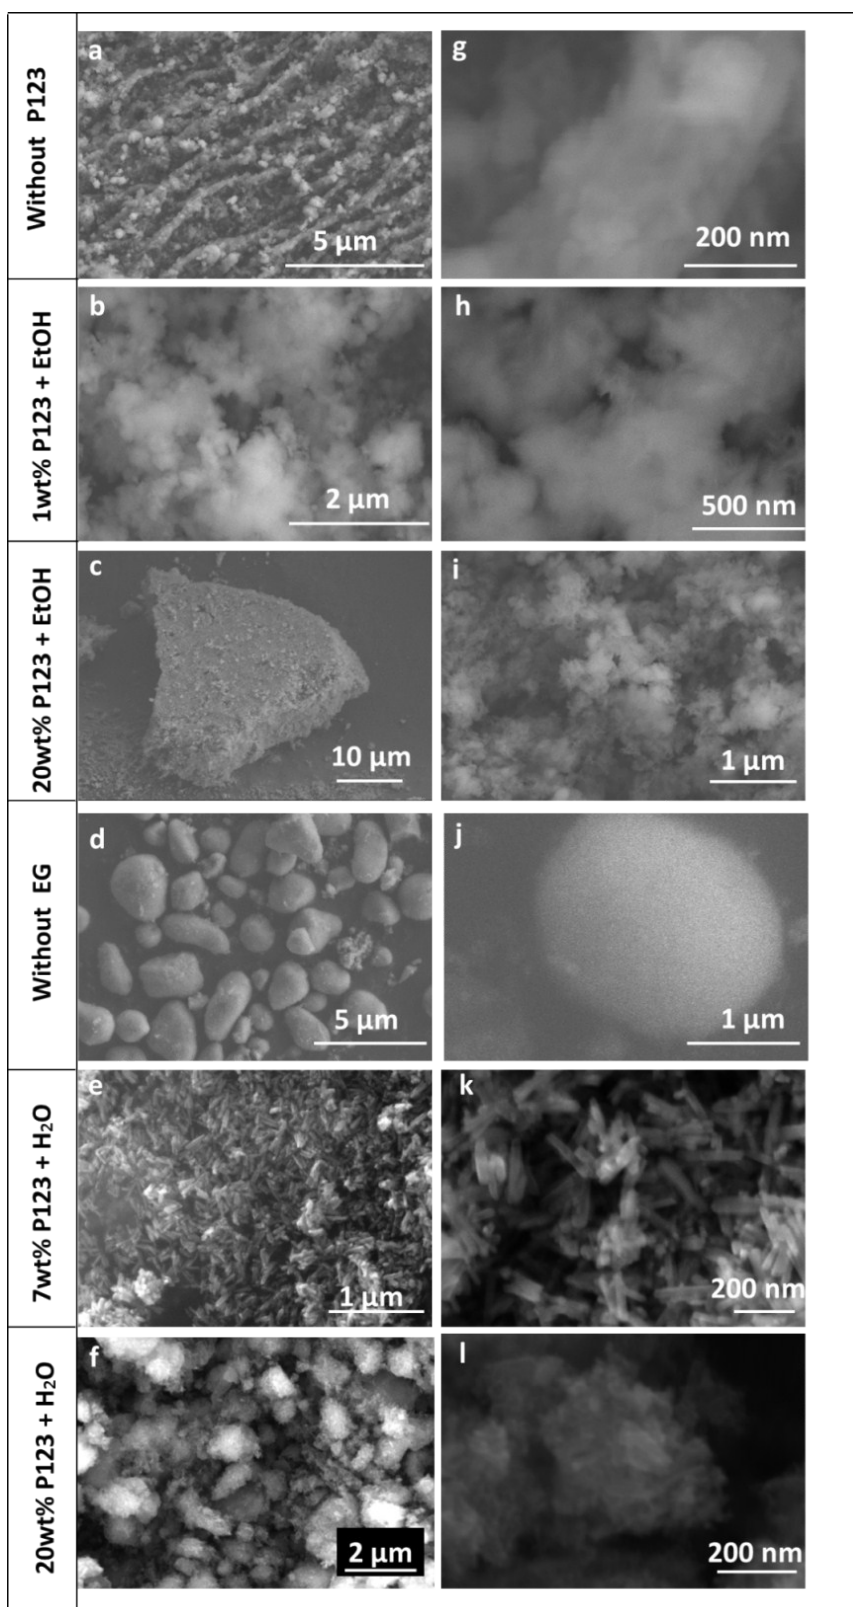

Fig. S3 Roles of the addition of P123, EG, and EtOH in the synthesis of the 2D TiO<sub>2</sub> nanosheets. (a, g) Morphology of the products of TiO<sub>2</sub> synthesized from the solution without P123; (b, h) morphology of the products of TiO<sub>2</sub> synthesized from the solution with the addition of 1 wt% P123; (c, i) morphology of the products of TiO<sub>2</sub> synthesized from the solution with the addition of

20 wt% P123; (d, j) morphology of the products of  $\text{TiO}_2$  synthesized from the solution without EG; (e, k, f, l) morphology of the products of  $\text{TiO}_2$  synthesized from the solution with the addition of water. The results show that all of the added P123, EG, and water are crucial for the formation of 2D  $\text{TiO}_2$  nanosheets.

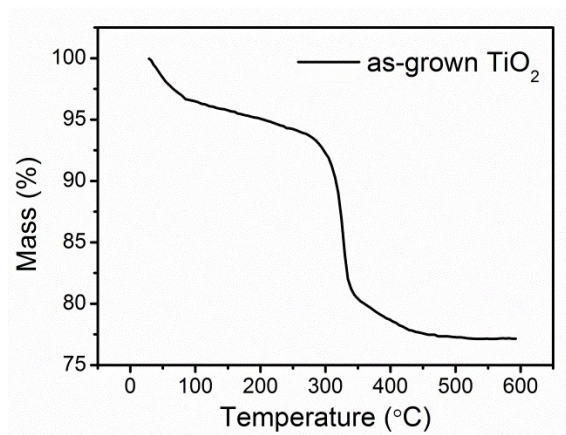

Fig. S4 TG curve of the as-grown  $\text{TiO}_2$  nanosheets, indicating the residual organic species are completely consumed at a temperature of 500 $^{\circ}\text{C}$ .

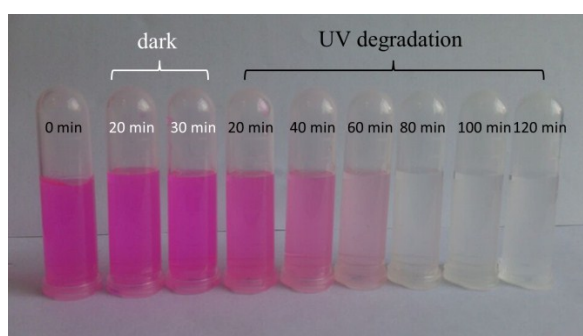

Fig. S5 The photograph of adsorption process in dark and photodegradation process under UV irradiance of RhB by 2D  $\text{TiO}_2$  nanosheets calcined at 500  $^{\circ}\text{C}$ .

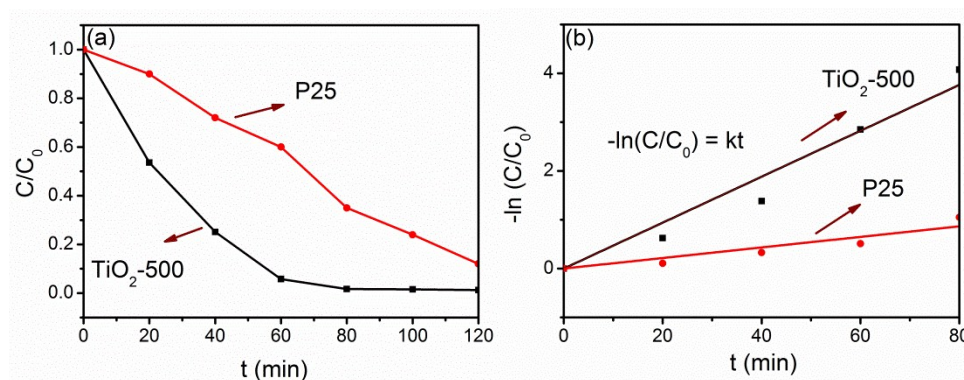

Fig. S6 (a) Photodegradation curves of RhB over  $\text{TiO}_2$ -500 and P25  $\text{TiO}_2$ . (b)  $-\ln(C/C_0)$  versus time

curves. The apparent rate constant for RhB photodegradation by  $\text{TiO}_2\text{-500}$  ( $0.0471 \text{ min}^{-1}$ ) is 4.3 times higher than that with P25  $\text{TiO}_2$  ( $0.0108 \text{ min}^{-1}$ ).

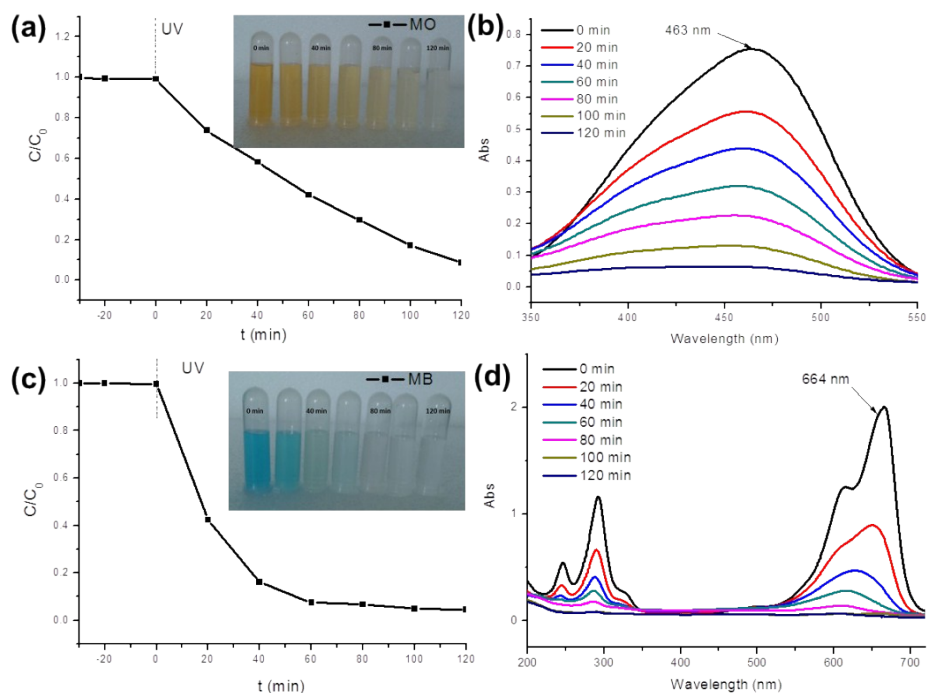

Fig. S7 (a, c) Photo-degradation rate of MO, MB by  $\text{TiO}_2\text{-500}$  catalyst under UV irradiation. The insets are photograph showing the corresponding photodegradation process of MO and MB. (b, d) UV-Vis absorption spectra of MO, MB with  $\text{TiO}_2\text{-500}$  catalyst as a function of irradiation time.
